# Supplementary material
Source: PubMed Central journal article supplement (PMC4286402)

**Title:** The Role of Small Heterodimer Partner (SHP) in NAFLD Improvement after Vertical Sleeve Gastrectomy in Mice.

**Authors:** Andriy Myronovych, MD, PhD<sup>1</sup>, Rosa-Maria Salazar-Gonzales, PhD<sup>1</sup>, Karen K. Ryan, PhD<sup>3</sup>, Lili Miles MD<sup>1</sup>, Wujuan Zhang, PhD<sup>2</sup>, Pinky Jha, MS<sup>2</sup>, Li Wang PhD<sup>4</sup>, Kenneth DR Setchell, PhD<sup>2</sup>, Randy J Seeley, PhD<sup>3</sup>, Rohit Kohli, MBBS, MS<sup>1,3</sup>

**Author Affiliations:** <sup>1</sup> Department of Pediatrics, Division of Gastroenterology, Hepatology and Nutrition, Cincinnati Children's Hospital Medical Center, 3333 Burnet Avenue, Cincinnati, Ohio, USA. <sup>2</sup> Department of Pathology and Laboratory Medicine, Cincinnati Children's Hospital Medical Center, 3333 Burnet Avenue, Cincinnati, Ohio, USA. <sup>3</sup> Metabolic Diseases Institute, Department of Internal Medicine, University of Cincinnati College of Medicine, 2170 E. Galbraith Road, Cincinnati, Ohio, USA. <sup>4</sup> Departments of Medicine and Oncological Sciences, Huntsman Cancer Institute, University of Utah School of Medicine, 30 North 1900 East SOM 4R118, Salt Lake City, Utah, USA.

Andriy Myronovych [Andriy.myronovych@cchmc.org](mailto:Andriy.myronovych@cchmc.org)

Rosa-Maria Salazar-Gonzales [Rosa\\_Maria.Salazar\\_Gonzalez@cchmc.org](mailto:Rosa_Maria.Salazar_Gonzalez@cchmc.org)

Karen K. Ryan [ryank2@ucmail.uc.edu](mailto:ryank2@ucmail.uc.edu)

Lili Miles [Lili.Miles@cchmc.org](mailto:Lili.Miles@cchmc.org)

Wujuan Zhang [Wujuan.Zhang@cchmc.org](mailto:Wujuan.Zhang@cchmc.org)

Pinky Jha [pinkyj76@yahoo.com](mailto:pinkyj76@yahoo.com)

Li Wang [l.wang@hsc.utah.edu](mailto:l.wang@hsc.utah.edu)

Kenneth DR Setchell [Kenneth.Setchell@cchmc.org](mailto:Kenneth.Setchell@cchmc.org)

Randy J Seeley [seeleyrj@ucmail.uc.edu](mailto:seeleyrj@ucmail.uc.edu)

**Corresponding author contact information:** Rohit Kohli, MBBS, MS, Department of Pediatrics, Division of Gastroenterology, Hepatology and Nutrition, Cincinnati Children's Hospital Medical Center, MLC 2010, 3333 Burnet Avenue, Cincinnati, Ohio, USA, 45229. Tel.: 1-513-803-0908, Fax: 1-513-803-2785, E-mail: [rohit.kohli@cchmc.org](mailto:rohit.kohli@cchmc.org)

**SUPPLEMENTARY DATA:**

**FIGURE 1**

**Liver tissue flow cytometry.**

Detection of the CD3+CD4+CD69+, CD3+CD8+CD69+ and CD3+NK+CD69+ and NK+CD69+ immune cell subpopulations in the liver by flow cytometry. Dot plots show different cells subsets after gating in the corresponding cell markers.

# Supplementary Figure 1

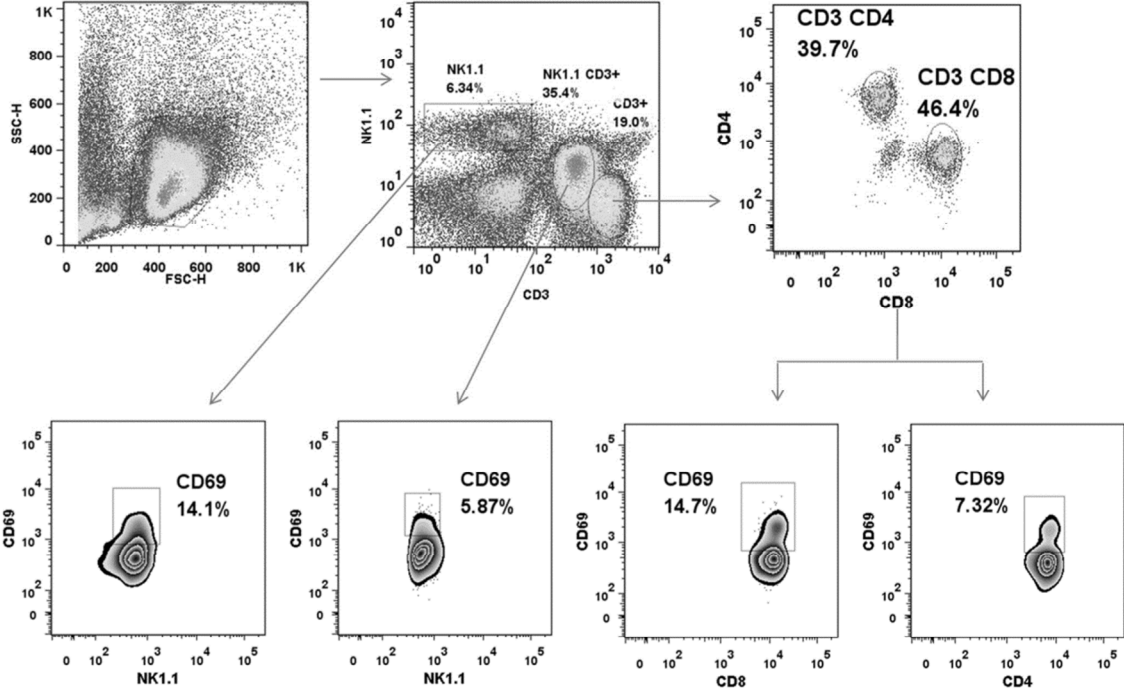

## FIGURE 2

**Serum BA composition analysis of WT Sham and WT VSG mice at day 60 post-surgery: unconjugated, total taurine-conjugated and total BA levels (left) and individual taurine-conjugated BA levels (right).**

The majority of BA and, as a result, total BA levels, were significantly higher in serum of WT VSG compared to WT Sham mice. The following BA are indicated: muricholic acid (MCA), cholic acid (CA), ursodeoxycholate (UDCA), deoxycholate (DCA), tauromuricholate (TMCA), taurocholate (TCA), tauroursodeoxycholate (TUDCA), taurohyodeoxycholate (THDCA), taurochenodeoxycholate (TCDCA), taurodeoxycholate (TDCA). N: WT Sham=4, WT VSG =6. (\*= $p < 0.05$ , \*\*= $p < 0.01$ , t-test).

## Supplementary Figure 2

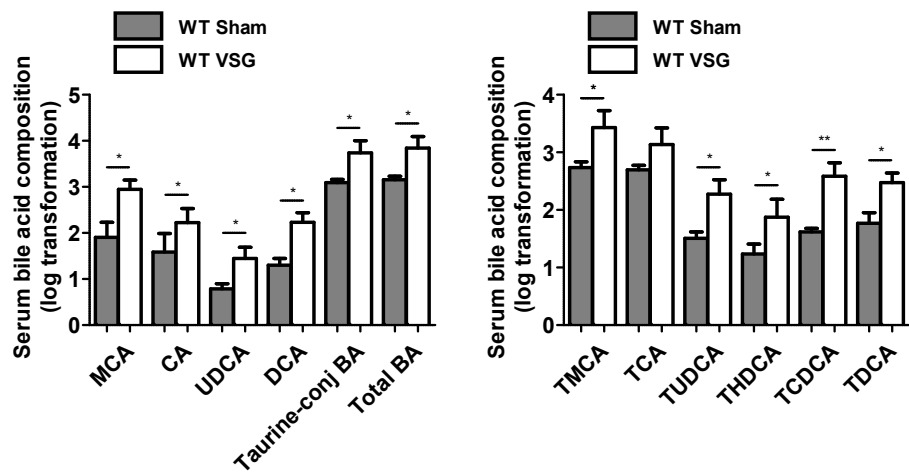

### **FIGURE 3**

#### **Immune cell subpopulations in the livers of WT and SHP-KO mice after eight week HFD period.**

The ratios of T lymphocyte CD4-CD69+, CD8-CD69+ and NK-CD69+ immune cells were much higher in the SHP-KO vs. WT mice. Flow cytometry dot plots of the representative samples from both groups are shown. Bar graphs show the average values  $\pm$  SEM of both groups. N: WT=6, SHP-KO=7. (\*=p<0.05, \*\*=p<0.01, t-test).

## Supplementary Figure 3

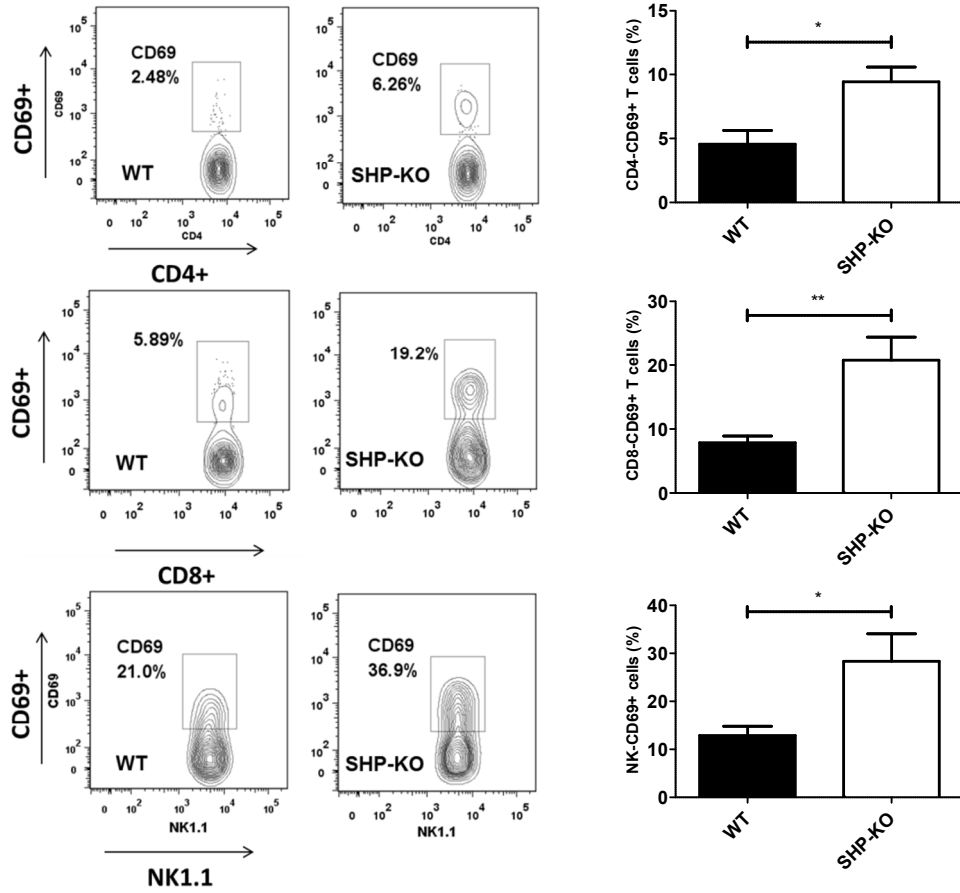



**FIGURE 4**

**Immune cell subpopulations in the livers of WT and SHP-Tg mice after eight week HFD period.**

No difference in liver immune cell subpopulations was observed between WT and SHP-Tg mice. Bar graphs show the average values  $\pm$  SEM of both groups. N: WT=5, SHP-Tg=5.

## Supplementary Figure 4

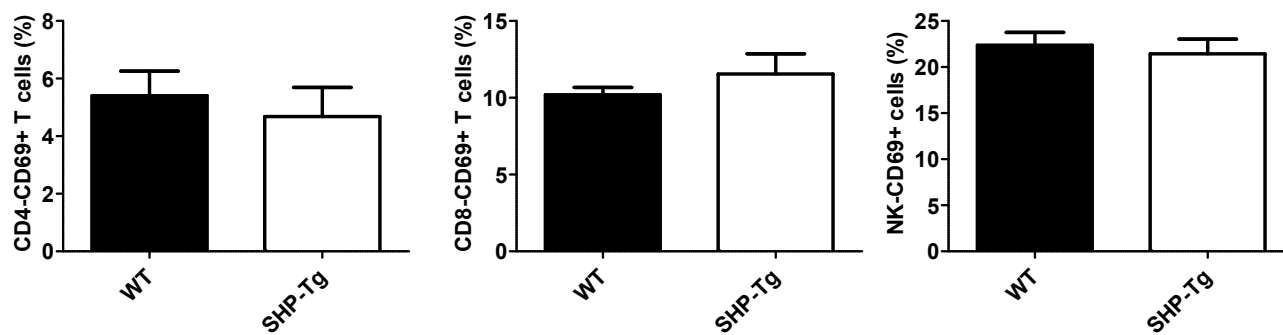

**Title:** The Role of Small Heterodimer Partner (SHP) in NAFLD Improvement after Vertical Sleeve Gastrectomy in Mice.

**Authors:** Andriy Myronovych, MD, PhD<sup>1</sup>, Rosa-Maria Salazar-Gonzales, PhD<sup>1</sup>, Karen K. Ryan, PhD<sup>3</sup>, Lili Miles MD<sup>1</sup>, Wujuan Zhang, PhD<sup>2</sup>, Pinky Jha, MS<sup>2</sup>, Li Wang PhD<sup>4</sup>, Kenneth DR Setchell, PhD<sup>2</sup>, Randy J Seeley, PhD<sup>3</sup>, Rohit Kohli, MBBS, MS<sup>1,3</sup>

**Author Affiliations:** <sup>1</sup> Department of Pediatrics, Division of Gastroenterology, Hepatology and Nutrition, Cincinnati Children's Hospital Medical Center, 3333 Burnet Avenue, Cincinnati, Ohio, USA. <sup>2</sup> Department of Pathology and Laboratory Medicine, Cincinnati Children's Hospital Medical Center, 3333 Burnet Avenue, Cincinnati, Ohio, USA. <sup>3</sup> Metabolic Diseases Institute, Department of Internal Medicine, University of Cincinnati College of Medicine, 2170 E. Galbraith Road, Cincinnati, Ohio, USA. <sup>4</sup> Departments of Medicine and Oncological Sciences, Huntsman Cancer Institute, University of Utah School of Medicine, 30 North 1900 East SOM 4R118, Salt Lake City, Utah, USA.

Andriy Myronovych [Andriy.myronovych@cchmc.org](mailto:Andriy.myronovych@cchmc.org)

Rosa-Maria Salazar-Gonzales [Rosa\\_Maria.Salazar\\_Gonzalez@cchmc.org](mailto:Rosa_Maria.Salazar_Gonzalez@cchmc.org)

Karen K. Ryan [ryank2@ucmail.uc.edu](mailto:ryank2@ucmail.uc.edu)

Lili Miles [Lili.Miles@cchmc.org](mailto:Lili.Miles@cchmc.org)

Wujuan Zhang [Wujuan.Zhang@cchmc.org](mailto:Wujuan.Zhang@cchmc.org)

Pinky Jha [pinkyj76@yahoo.com](mailto:pinkyj76@yahoo.com)

Li Wang [l.wang@hsc.utah.edu](mailto:l.wang@hsc.utah.edu)

Kenneth DR Setchell [Kenneth.Setchell@cchmc.org](mailto:Kenneth.Setchell@cchmc.org)

Randy J Seeley [seeleyrj@ucmail.uc.edu](mailto:seeleyrj@ucmail.uc.edu)

**Corresponding author contact information:** Rohit Kohli, MBBS, MS, Department of Pediatrics, Division of Gastroenterology, Hepatology and Nutrition, Cincinnati Children's Hospital Medical Center, MLC 2010, 3333 Burnet Avenue, Cincinnati, Ohio, USA, 45229. Tel.: 1-513-803-0908, Fax: 1-513-803-2785, E-mail: [rohit.kohli@cchmc.org](mailto:rohit.kohli@cchmc.org)

**SUPPLEMENTARY DATA:**

**FIGURE 1**

**Liver tissue flow cytometry.**

Detection of the CD3+CD4+CD69+, CD3+CD8+CD69+ and CD3+NK+CD69+ and NK+CD69+ immune cell subpopulations in the liver by flow cytometry. Dot plots show different cells subsets after gating in the corresponding cell markers.

## Supplementary Figure 1

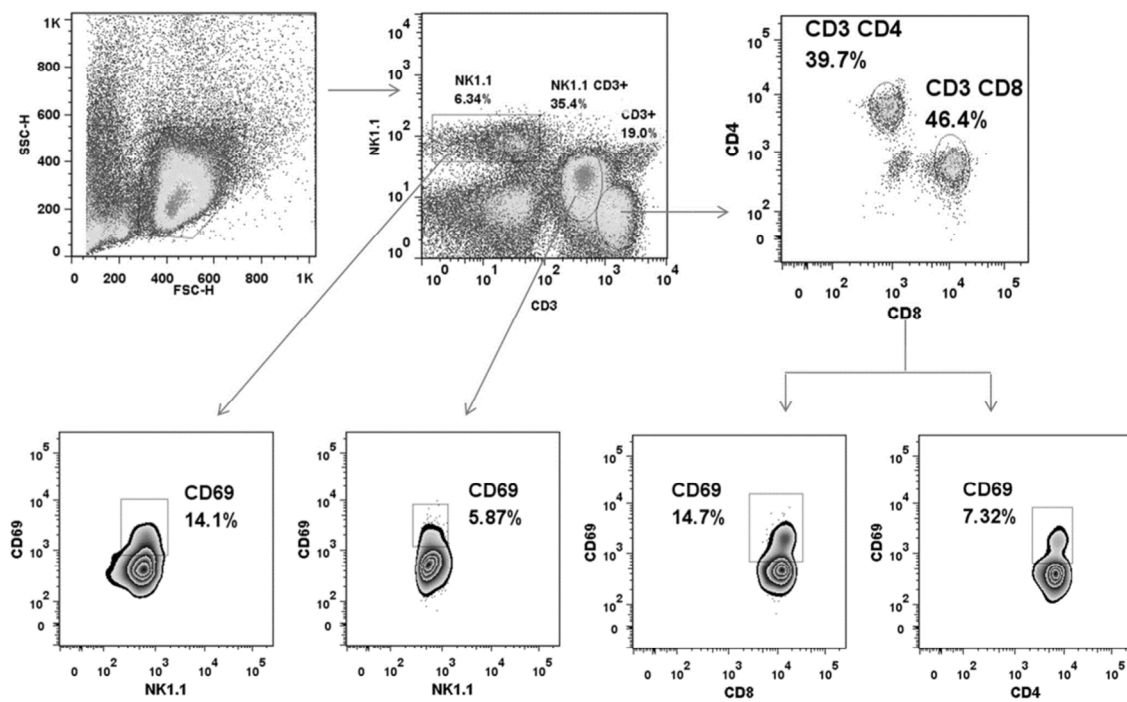

## FIGURE 2

**Serum BA composition analysis of WT Sham and WT VSG mice at day 60 post-surgery: unconjugated, total taurine-conjugated and total BA levels (left) and individual taurine-conjugated BA levels (right).**

The majority of BA and, as a result, total BA levels, were significantly higher in serum of WT VSG compared to WT Sham mice. The following BA are indicated: muricholic acid (MCA), cholic acid (CA), ursodeoxycholate (UDCA), deoxycholate (DCA), tauromuricholate (TMCA), taurocholate (TCA), tauroursodeoxycholate (TUDCA), taurohyodeoxycholate (THDCA), taurochenodeoxycholate (TCDCA), taurodeoxycholate (TDCA). N: WT Sham=4, WT VSG =6. (\*= $p < 0.05$ , \*\*= $p < 0.01$ , t-test).

## Supplementary Figure 2

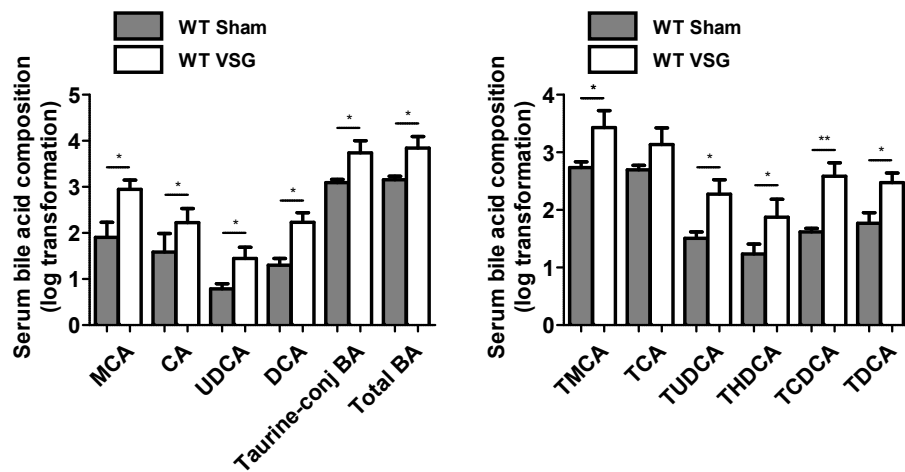



### **FIGURE 3**

#### **Immune cell subpopulations in the livers of WT and SHP-KO mice after eight week HFD period.**

The ratios of T lymphocyte CD4-CD69+, CD8-CD69+ and NK-CD69+ immune cells were much higher in the SHP-KO vs. WT mice. Flow cytometry dot plots of the representative samples from both groups are shown. Bar graphs show the average values  $\pm$  SEM of both groups. N: WT=6, SHP-KO=7. (\*=p<0.05, \*\*=p<0.01, t-test).

## Supplementary Figure 3



**FIGURE 4**

**Immune cell subpopulations in the livers of WT and SHP-Tg mice after eight week HFD period.**

No difference in liver immune cell subpopulations was observed between WT and SHP-Tg mice. Bar graphs show the average values  $\pm$  SEM of both groups. N: WT=5, SHP-Tg=5.

## Supplementary Figure 4

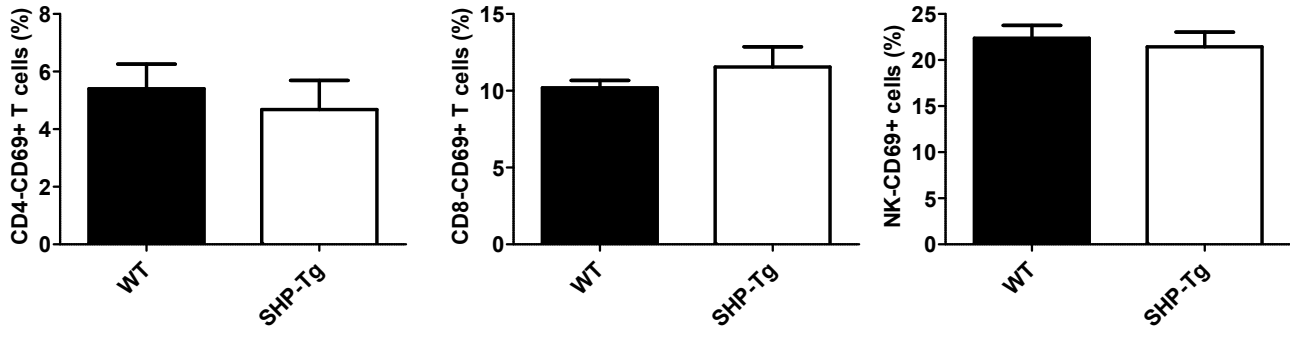

Supplement: NIHMS622675-supplement-01.pdf [file NIHMS622675-supplement-01.pdf]
